# Supplementary material for: Metabolomes of mitochondrial diseases and inclusion body myositis patients: treatment targets and biomarkers
Source: PubMed Central journal article supplement (PMC6284386; doi:10.15252/emmm.201809091), 2018-10-29
Supplement: EMMM-10-e9091-s001.pdf [file EMMM-10-e9091-s001.pdf]

## Expanded View Figures

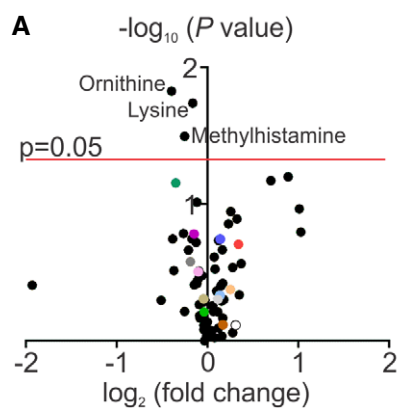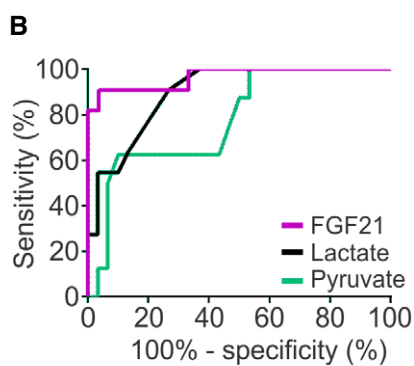

**Figure EV1. Volcano plot of blood metabolites and ROC curves for reported / conventional blood biomarkers.**

A Volcano plot of all the blood metabolites of male ( $n = 14$ ) and female ( $n = 16$ ) controls. Colours in the volcano plot indicate the same most relevant and/or significantly changed metabolites as in Figs 1 and 2.

B ROC curves for conventional biomarkers in blood of muscle-manifesting PEO and MELAS/MIDD patients ( $n = 11$ ) compared to controls ( $n = 30$ ).

Data information: AUC of FGF21 0.97 (95% CI: 0.91–1.03,  $P < 0.0001$ ), lactate 0.897 (95% CI: 0.8–0.99,  $P = 0.00012$ ) and pyruvate 0.78 (95% CI: 0.6–0.95,  $P = 0.017$ ).
